# Supplementary material for: Controllable synthesis of layered K0.296Mn0.926O2 to assemble 2.4 V aqueous potassium-ion supercapacitors for double high devices
Source: Royal Society of Chemistry journal article supplement (doi:10.1039/d0ta04783j), 2020-01-01
Supplement: d0ta04783j1.pdf [file d0ta04783j1.pdf]

# Controllable Synthesis of Layered $K_{0.296}Mn_{0.926}O_2$ to Assemble 2.4 V Aqueous Potassium-Ion Supercapacitors for Double High Device

Xijun Wei,<sup>a</sup> Bin Zhang,<sup>b</sup> Minhui Liao,<sup>c</sup> Peng Xiao,<sup>\*a</sup> Xiaoyuan Zhou,<sup>b</sup> Yunhui Zhang,<sup>a</sup> Jiangtao Liu<sup>\*c</sup>

<sup>a</sup> College of Chemistry and Chemical Engineering, Chongqing University, Chongqing 400044, China

<sup>b</sup> Analytical and Testing Center of Chongqing University, Chongqing 400044, China

<sup>c</sup> State Key Laboratory of Advanced Chemical Power Sources, Guizhou Meiling Power Sources Co. Ltd., Zunyi, Guizhou 563003, China

## Notes

The authors declare no competing financial interest.

---

## Figure captions

**Figure.S1.** (a) (b) SEM images of the  $\text{MnO}_2$  and as-prepared  $\text{K}_{0.296}\text{Mn}_{0.926}\text{O}_2$ , respectively; (c) AFM image of the as-prepared  $\text{K}_{0.296}\text{Mn}_{0.926}\text{O}_2$ ; (d) Obtained 3D image from the AFM image in Figure S1c.

**Figure.S2.** Powder XRD patterns of the commercial  $\text{MnO}_2$ .

**Figure.S3.** XPS spectra analysis for the K 2p (a) and O 1s (b) of as-prepared  $\text{K}_{0.296}\text{Mn}_{0.926}\text{O}_2$ , respectively.

**Figure.S4.** XPS spectra of  $\text{MnO}_2$ (a) and O 1s (b), respectively.

**Figure.S5.** The EDX spectrum of  $\text{K}_{0.296}\text{Mn}_{0.926}\text{O}_2$ .

**Figure.S6.** (a) CV curves of commercial  $\text{MnO}_2$  at the scan rate between 10 and 80  $\text{mV s}^{-1}$ ; (b) Galvanostatic charge-discharge curves of commercial  $\text{MnO}_2$  at the current densities between 1 and 5  $\text{A g}^{-1}$ .

**Figure.S7.** Density of states (DOS) of the  $\text{MnO}_2$  and as-prepared  $\text{K}_{0.296}\text{Mn}_{0.926}\text{O}_2$  using density functional theory (DFT)

**Figure.S8.** CV curves of  $\text{MnO}_2$  and as-prepared  $\text{K}_{0.296}\text{Mn}_{0.926}\text{O}_2$  at the scan rate between 1 and 9  $\text{mV s}^{-1}$ , respectively.

**Figure.S9.** (a), (c) The contribution of the different energy storage mechanism of the  $\text{MnO}_2$  and  $\text{K}_{0.296}\text{Mn}_{0.926}\text{O}_2$  at 9  $\text{mV s}^{-1}$ ; (b), (d) Percentage of diffusion-controlled and surface-capacitance for the  $\text{MnO}_2$  and  $\text{K}_{0.296}\text{Mn}_{0.926}\text{O}_2$  at various scan rates, respectively.

**Figure S10.** (a), (b) The SEM images of  $\text{MnO}_2$  after cycling; (c), (d) EDS-mapping of Figure S9(b).

**Figure S11.** (a), (b) The SEM images of  $\text{K}_{0.296}\text{Mn}_{0.926}\text{O}_2$  after cycling.

**Figure S12.** The XRD spectrum of  $\text{K}_{0.296}\text{Mn}_{0.926}\text{O}_2$  after cycling.

**Figure.S13.** CV curves of  $\text{MnO}_2//\text{AC}$  at different potentials at a scan rate of 20  $\text{mV s}^{-1}$ .

**Figure.S14.** (a) CV curves of  $\text{MnO}_2//\text{AC}$  at the scan rate between 10 and 80  $\text{mV s}^{-1}$ ; (b) Galvanostatic charge-discharge curves of  $\text{MnO}_2//\text{AC}$  at the current densities between 1 and 5  $\text{A g}^{-1}$ .

**Figure. S15.** (a), (b) The computational models of bulk  $\text{MnO}_2$  and  $\text{K}_{0.296}\text{Mn}_{0.926}\text{O}_2$ , respectively.

**Table S1.** The comparative table of morphology, specific surface areas and average pore diameters of our prepared products with previously reported literature.

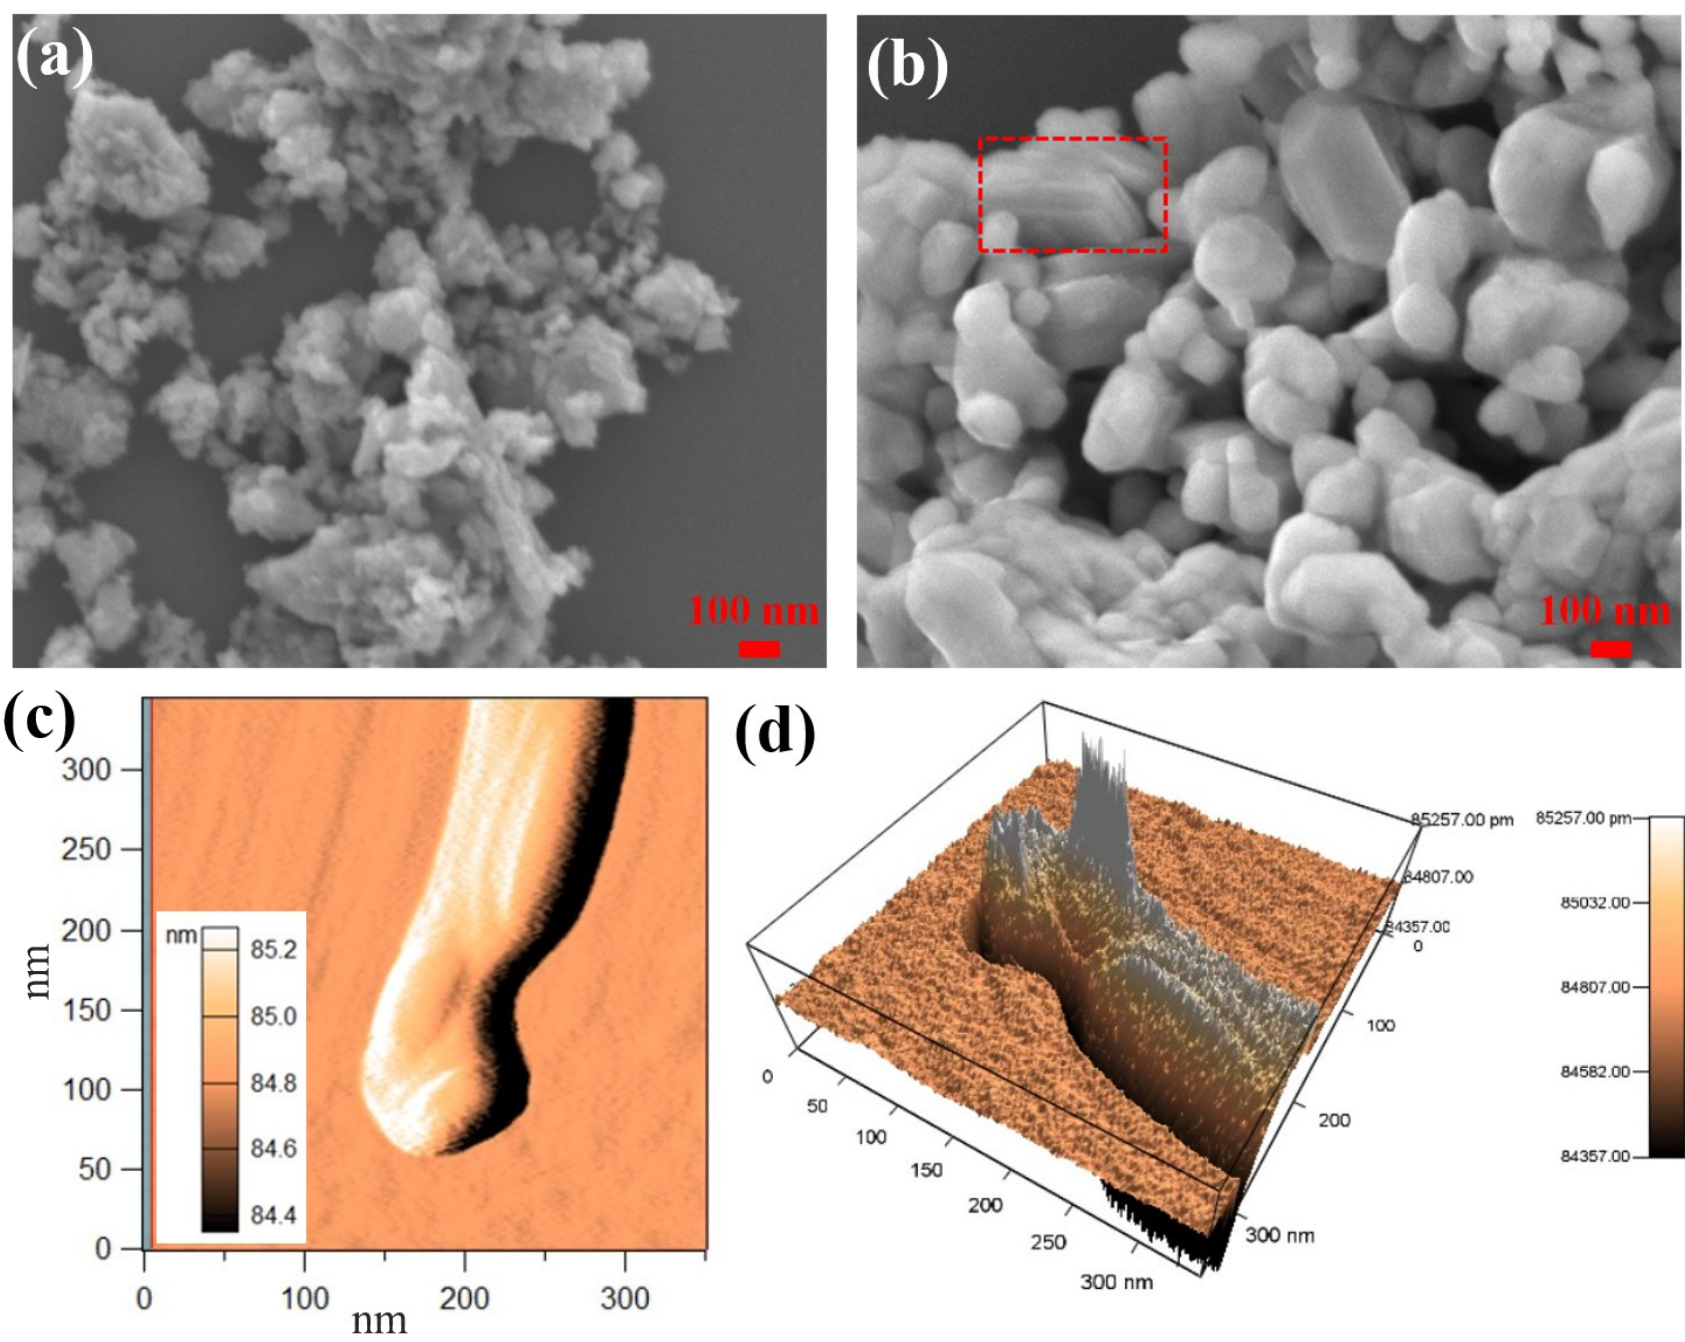

**Figure.S1.** (a) (b) SEM images of the  $\text{MnO}_2$  and as-prepared  $\text{K}_{0.296}\text{Mn}_{0.926}\text{O}_2$ , respectively; (c) AFM image of the as-prepared  $\text{K}_{0.296}\text{Mn}_{0.926}\text{O}_2$ ; (d) Obtained 3D image from the AFM image in Figure S1c.

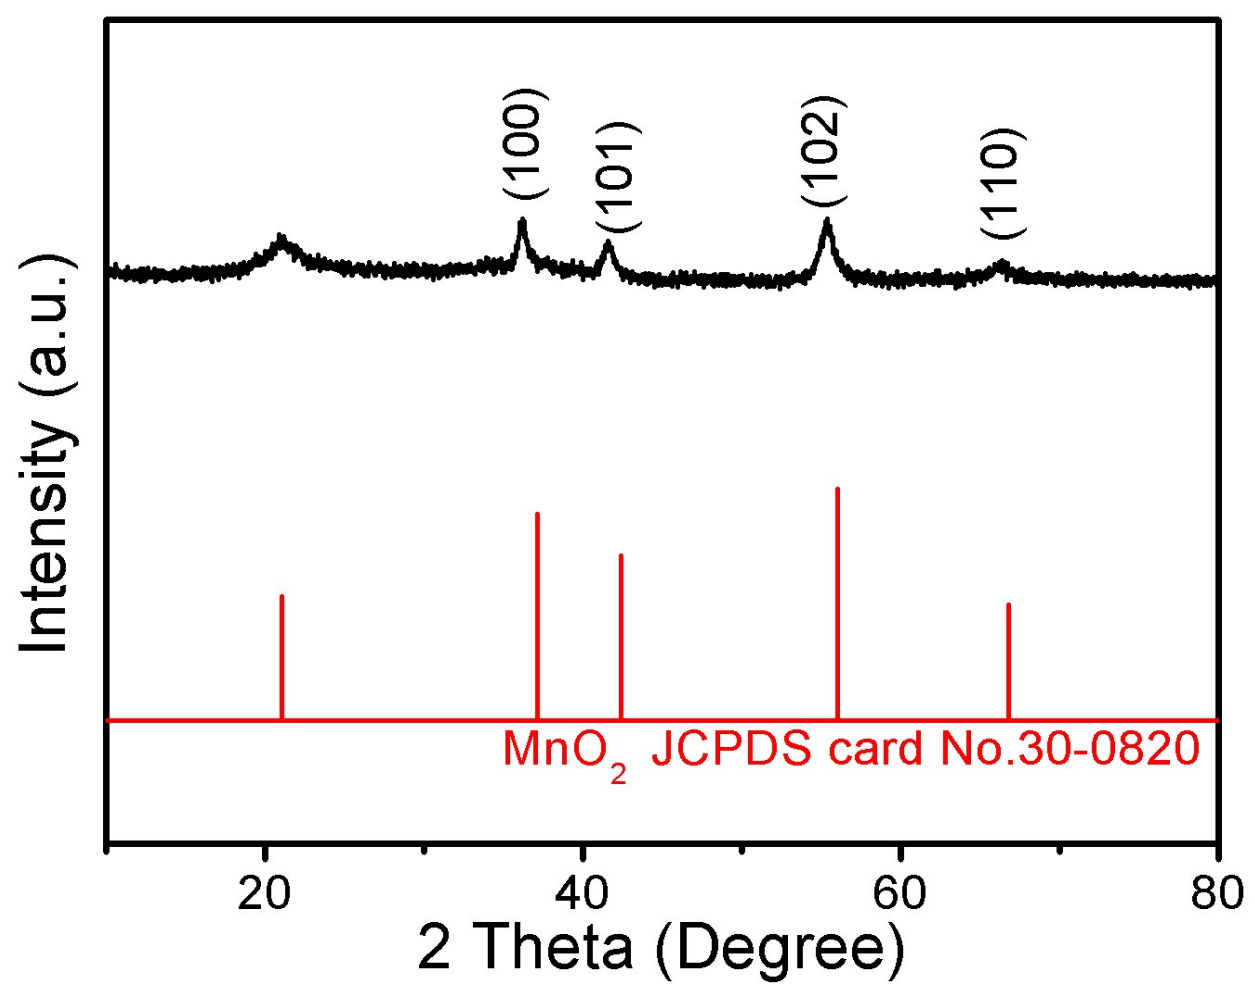

Figure.S2. Powder XRD pattern of the commercial MnO<sub>2</sub>.

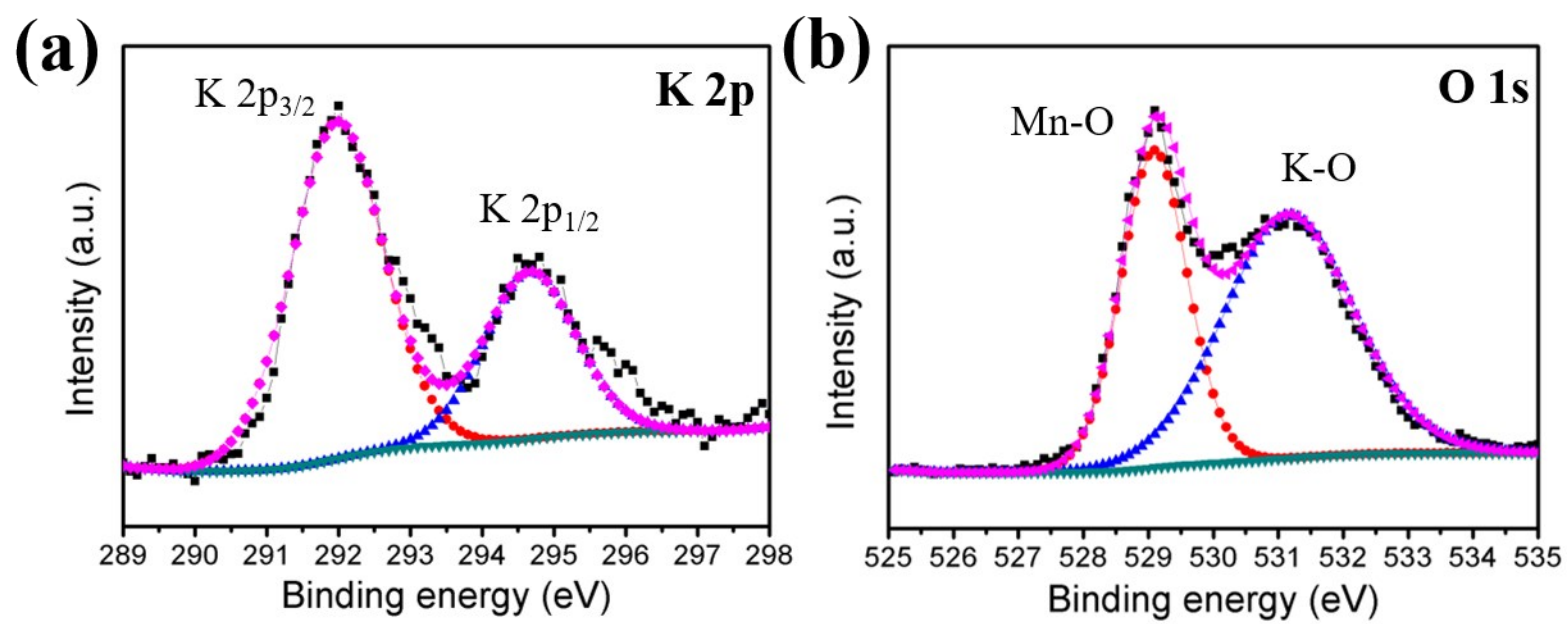

**Figure.S3.** XPS spectra analysis for the K 2p (a) and O 1s (b) of as-prepared  $K_{0.296}Mn_{0.926}O_2$ , respectively.

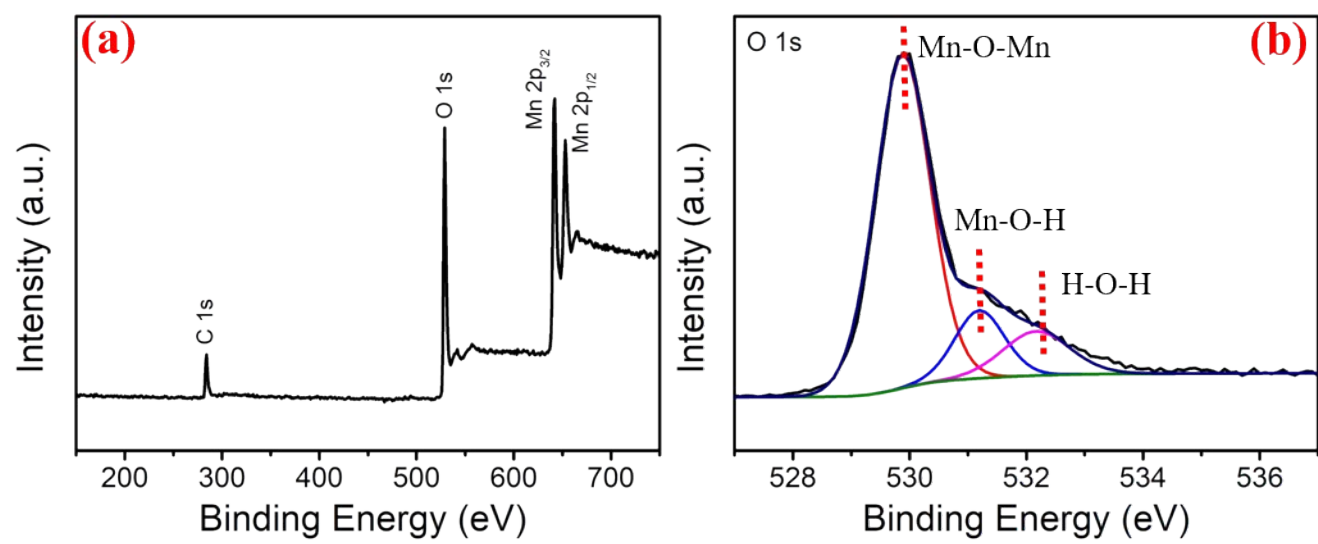

Figure.S4. XPS spectra of MnO<sub>2</sub>(a) and O 1s (b), respectively.

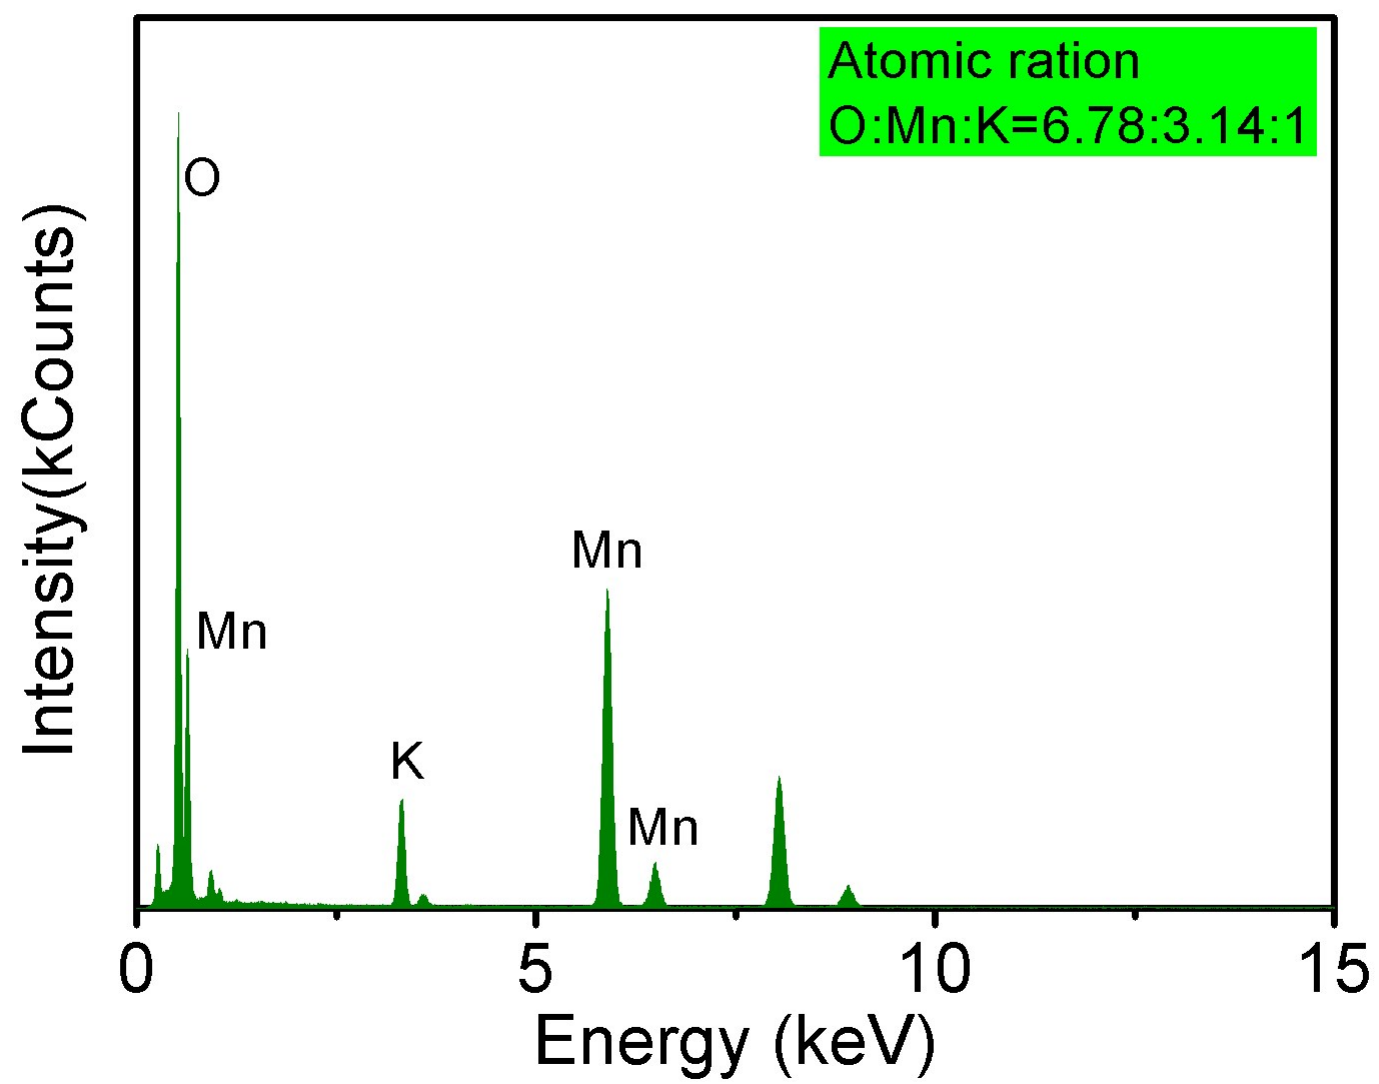

Figure.S5. The EDX spectrum of  $K_{0.296}Mn_{0.926}O_2$ .

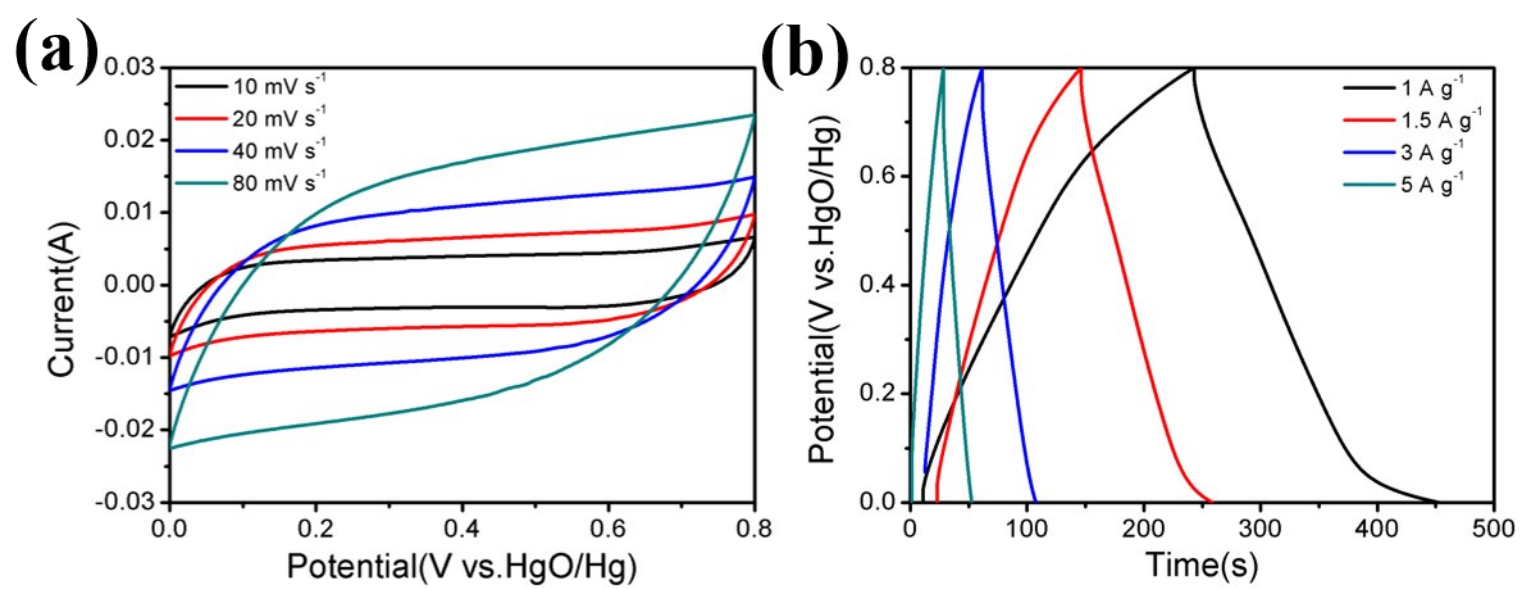

**Figure.S6.** (a) CV curves of commercial MnO<sub>2</sub> at the scan rate between 10 and 80 mV s<sup>-1</sup>; (b) Galvanostatic charge-discharge curves of commercial MnO<sub>2</sub> at the current densities between 1 and 5 A g<sup>-1</sup>.



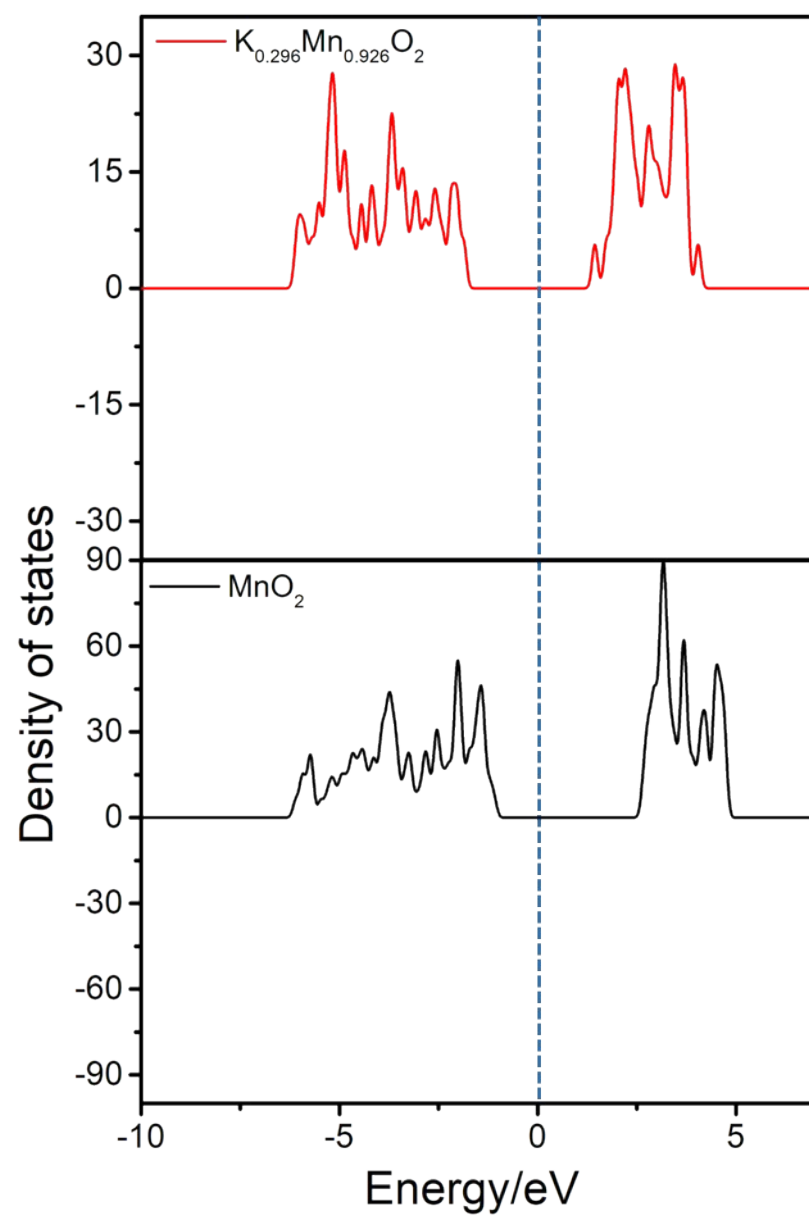

**Figure.S7.** Density of states (DOS) of the  $MnO_2$  and as-prepared  $K_{0.296}Mn_{0.926}O_2$  using density functional theory (DFT)

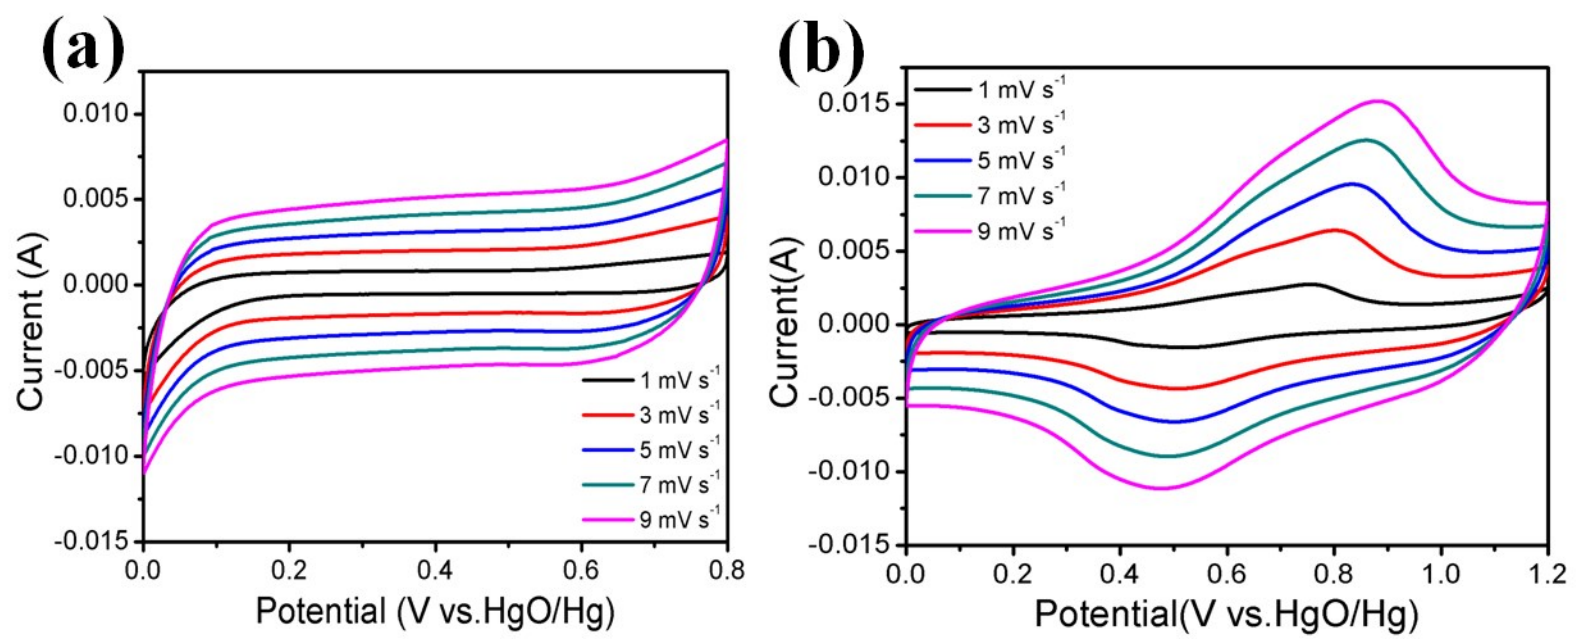

**Figure.S8.** (a), (b) CV curves of  $\text{MnO}_2$  and as-prepared  $\text{K}_{0.296}\text{Mn}_{0.926}\text{O}_2$  at the scan rate between 1 and 9  $\text{mV s}^{-1}$ , respectively.

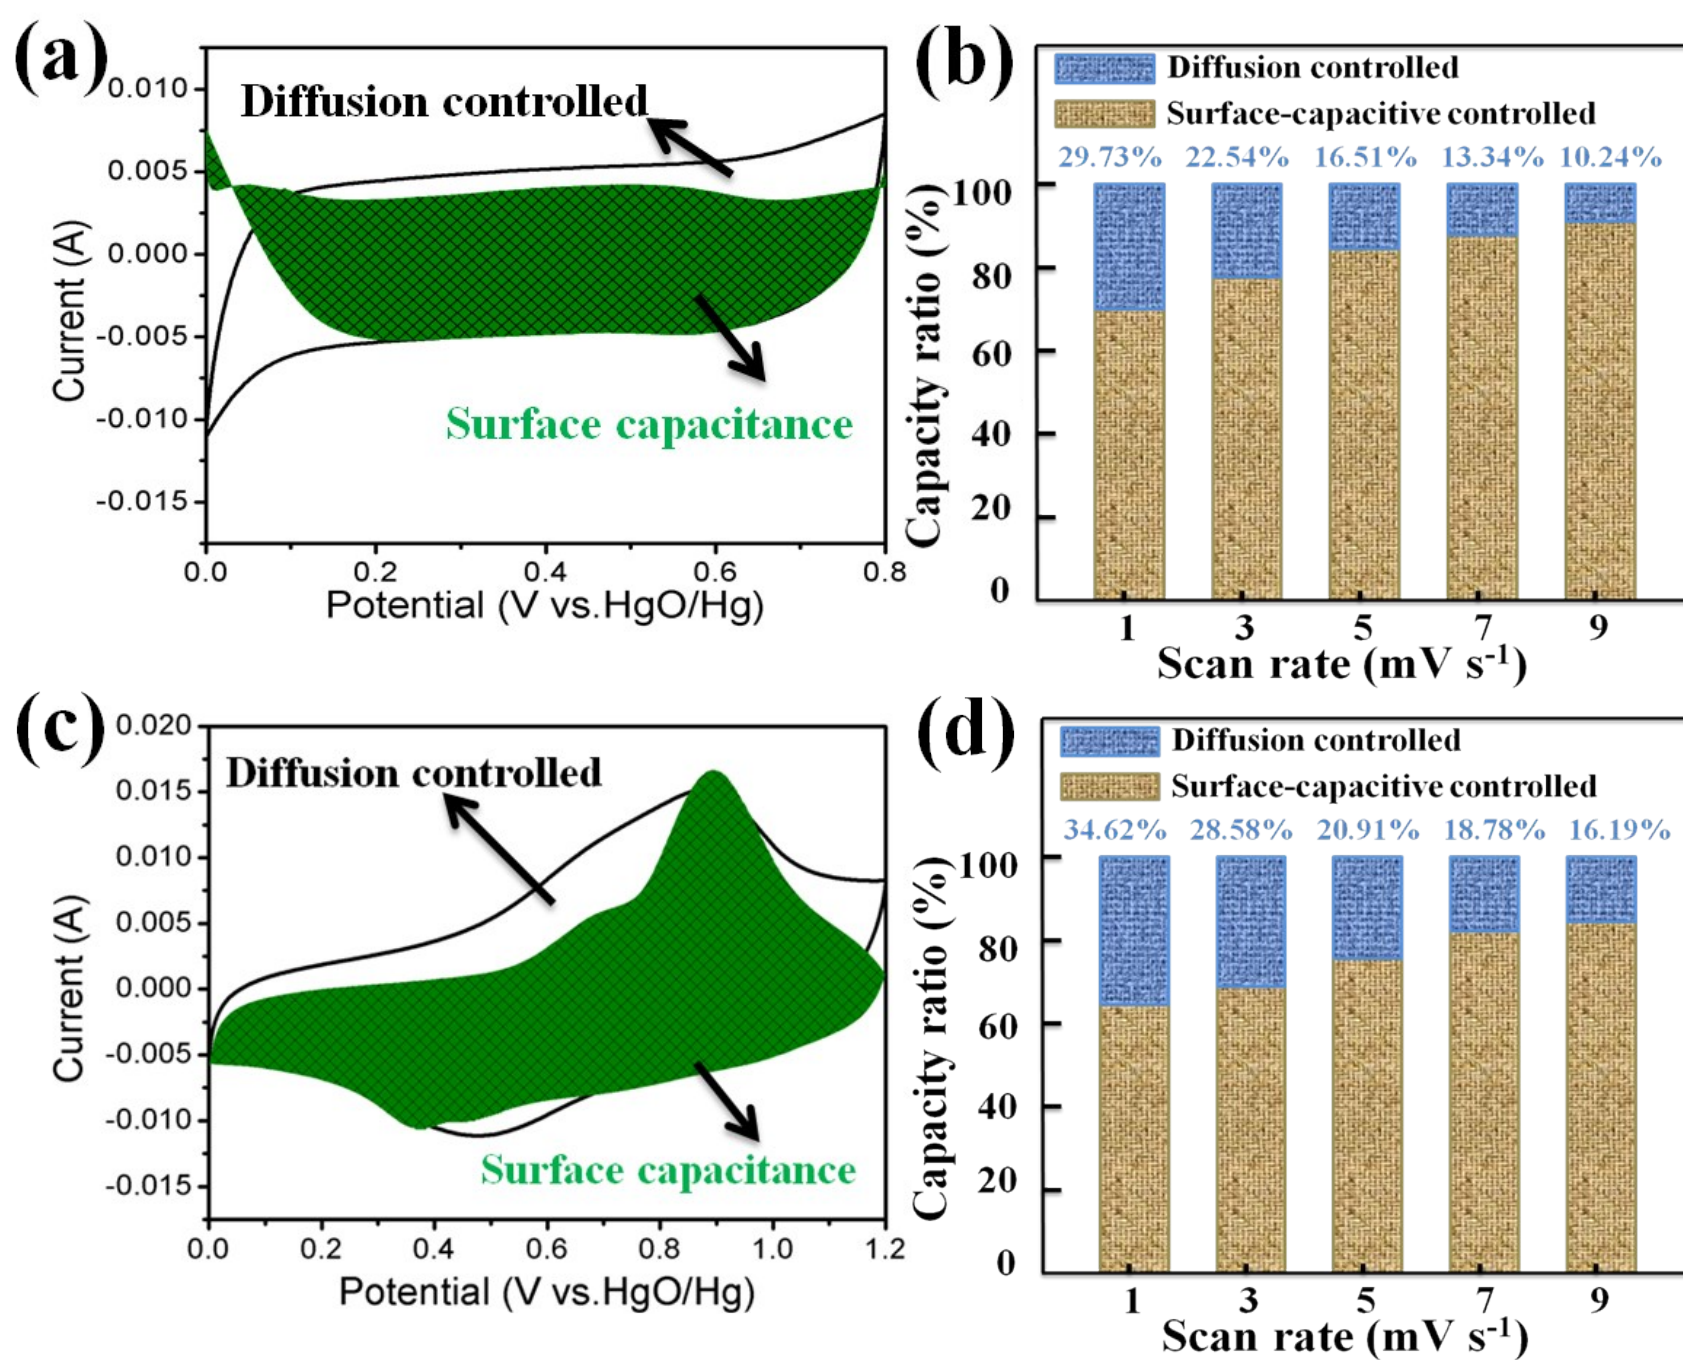

**Figure.S9.** (a), (c) The contribution of the different energy storage mechanism of the  $\text{MnO}_2$  and  $\text{K}_{0.296}\text{Mn}_{0.926}\text{O}_2$  at  $9 \text{ mV s}^{-1}$ ; (b), (d) Percentage of diffusion-controlled and surface-capacitance for the  $\text{MnO}_2$  and  $\text{K}_{0.296}\text{Mn}_{0.926}\text{O}_2$  at various scan rates, respectively.

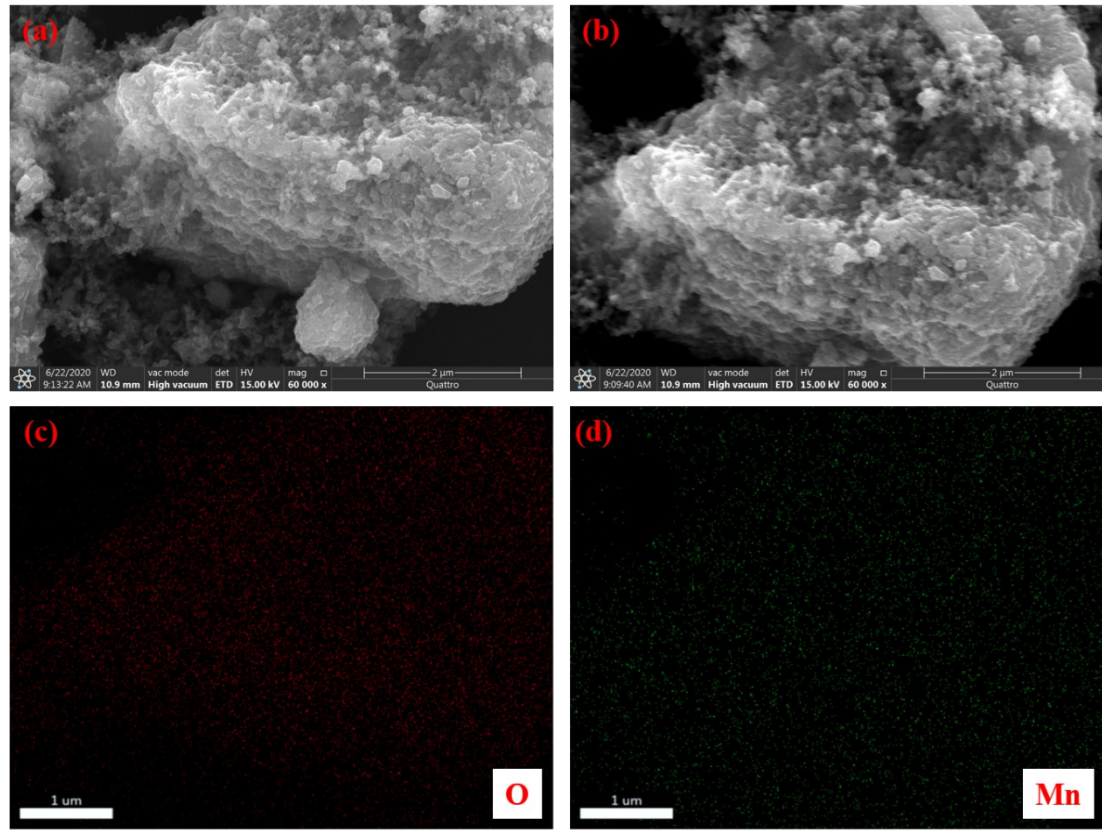

**Figure S10.** (a), (b) The SEM images of  $\text{MnO}_2$  after cycling; (c), (d) EDS-mapping of Figure S9(b).

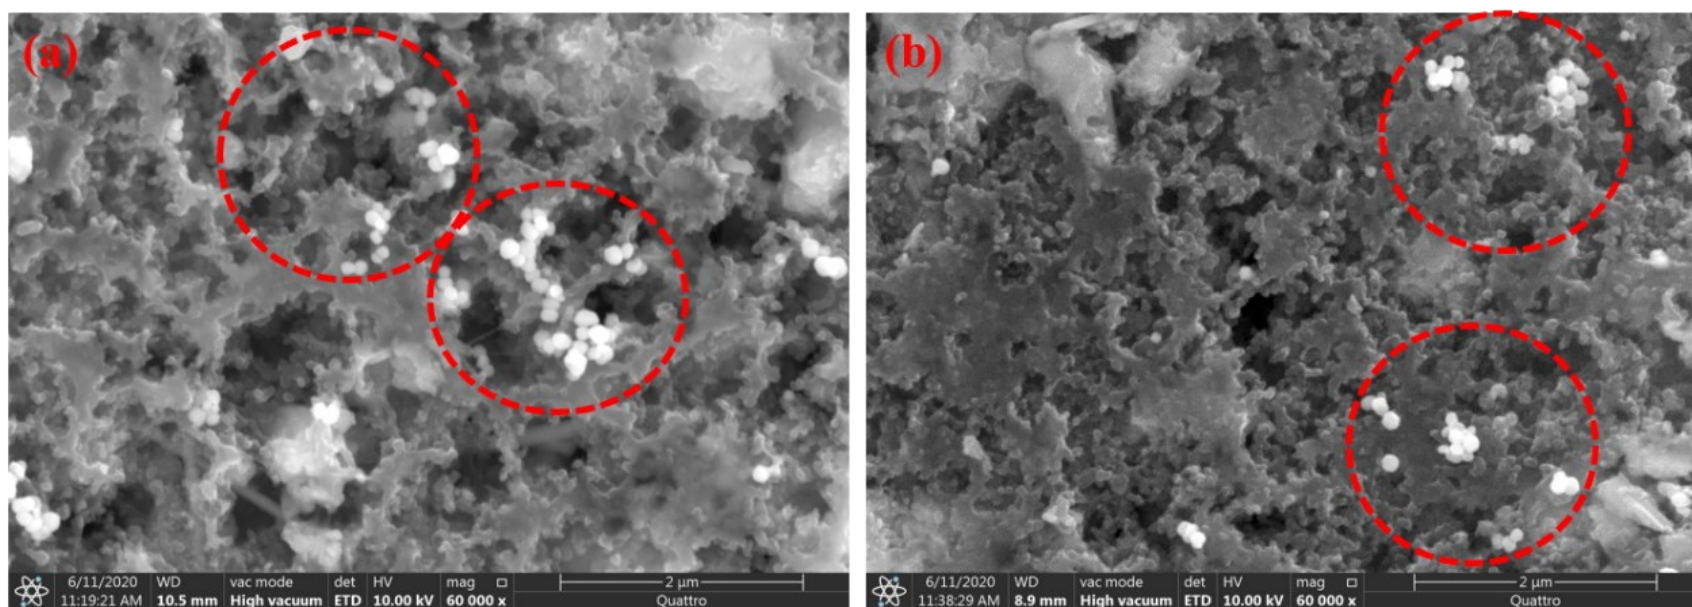

**Figure S11.** (a), (b) The SEM images of  $K_{0.296}Mn_{0.926}O_2$  after cycling.

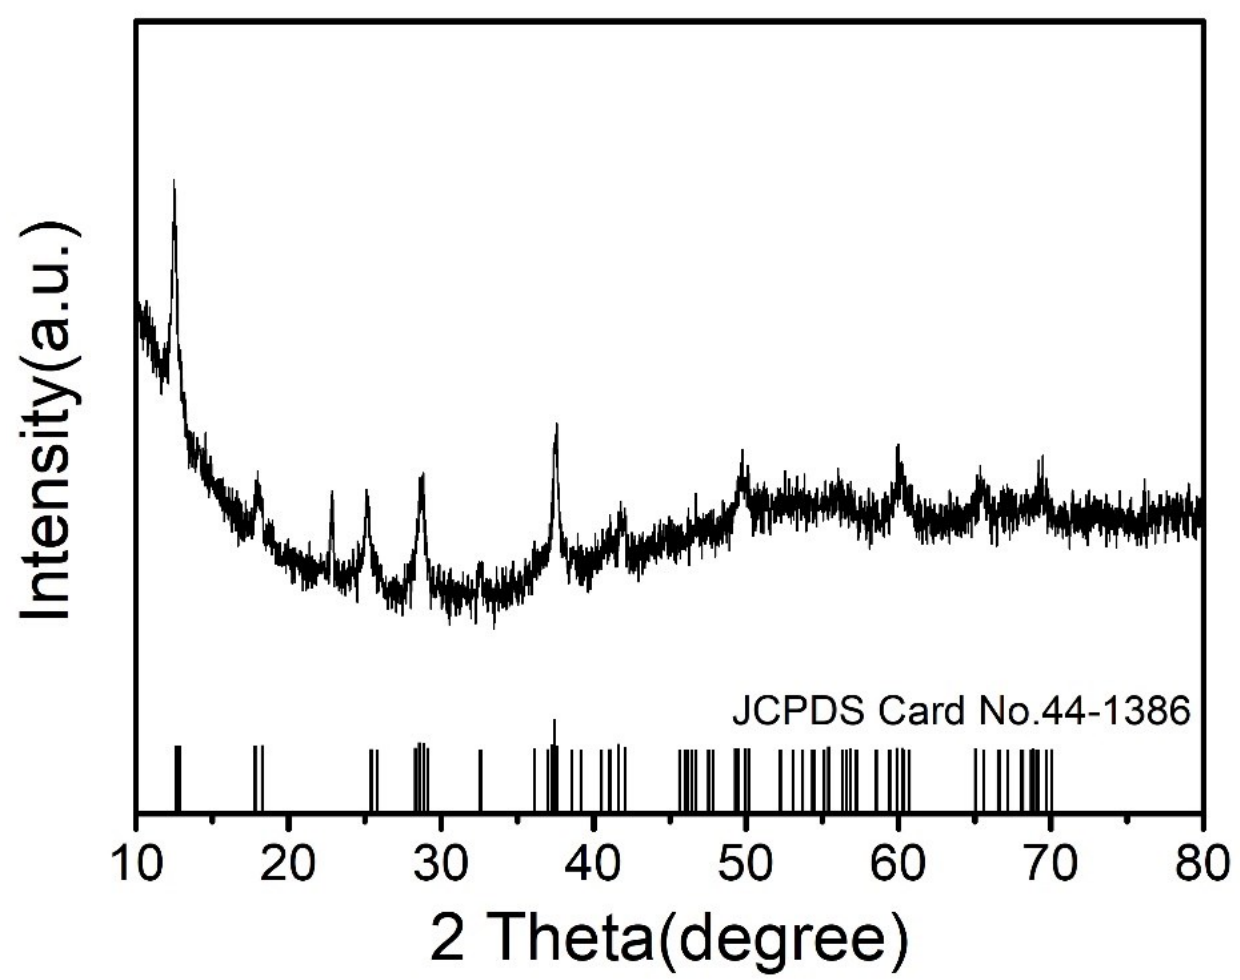

**Figure S12.** The XRD spectrum of  $K_{0.296}Mn_{0.926}O_2$  after cycling.

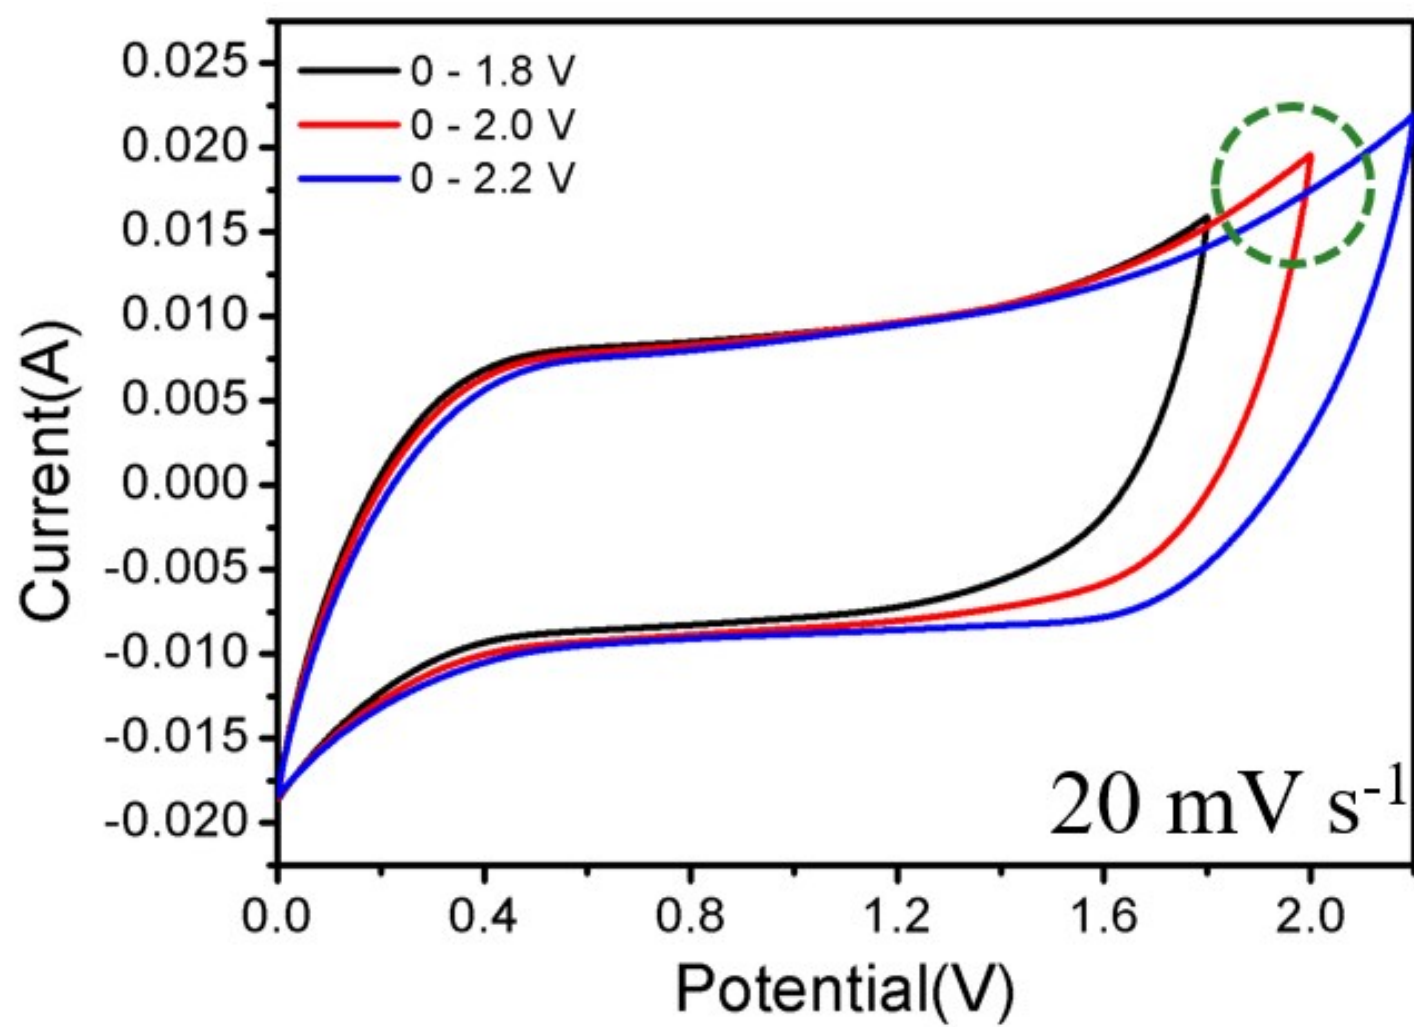

Figure.S13. CV curves of  $\text{MnO}_2//\text{AC}$  at different potentials at a scan rate of  $20 \text{ mV s}^{-1}$ .

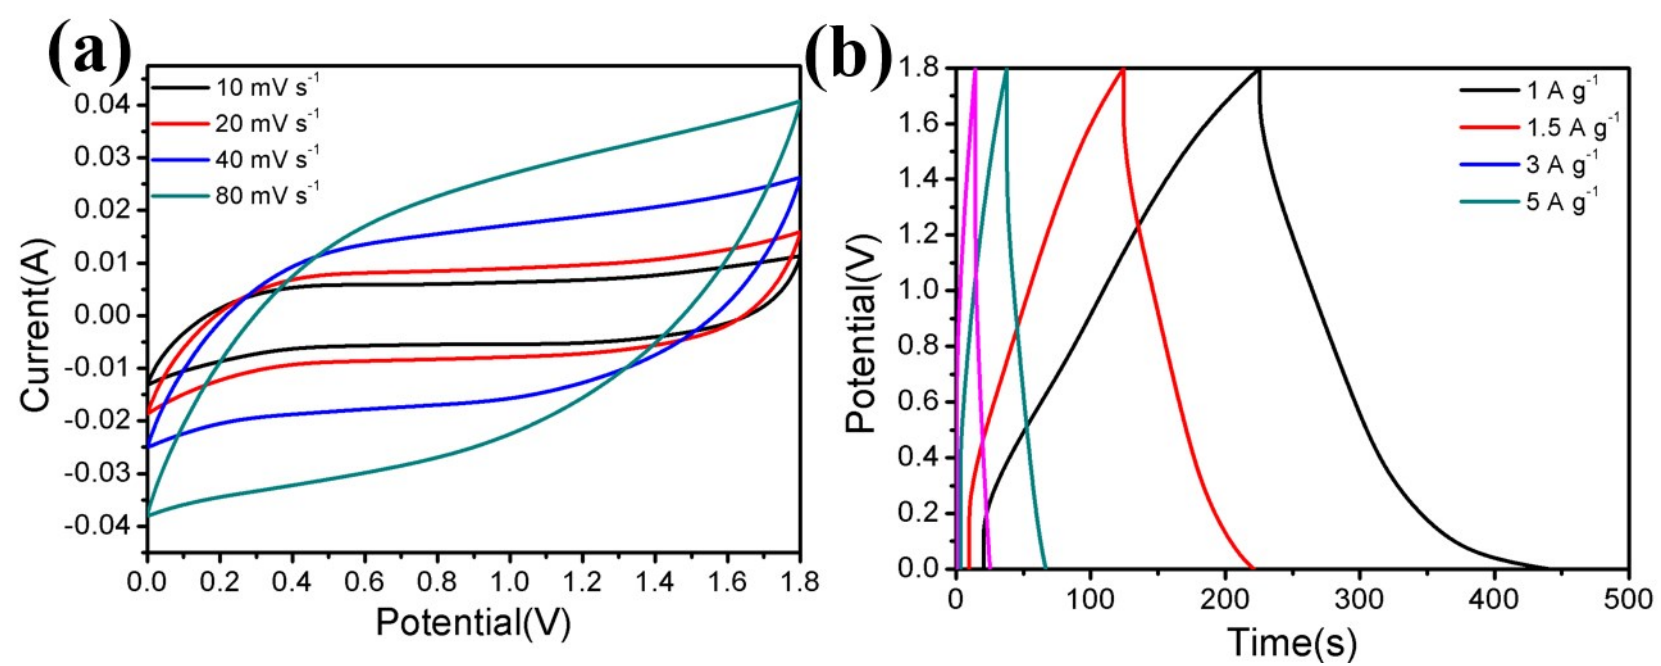

**Figure.S14.** (a) CV curves of MnO<sub>2</sub>//AC at the scan rate between 10 and 80 mV s<sup>-1</sup>; (b) Galvanostatic charge-discharge curves of MnO<sub>2</sub>//AC at the current densities between 1 and 5 A g<sup>-1</sup>.



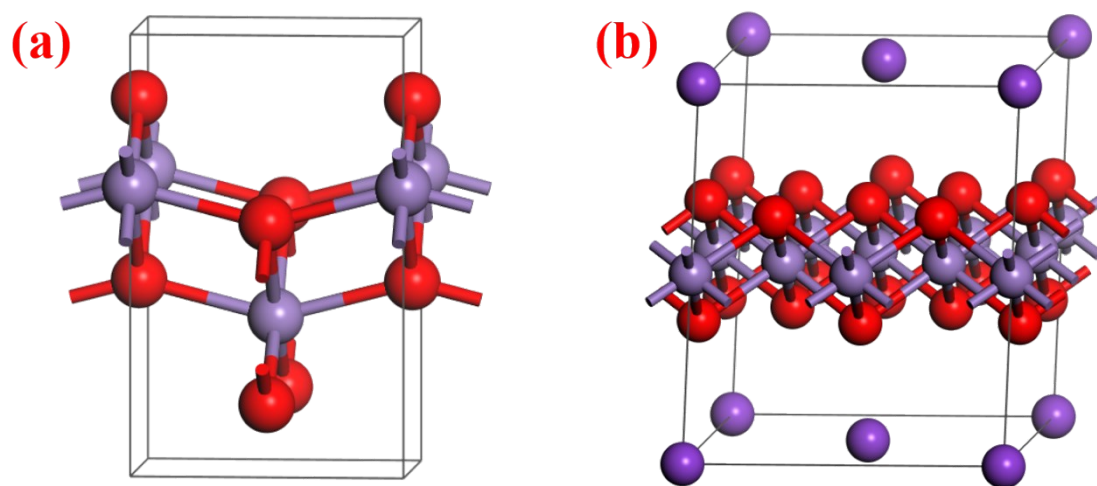

**Figure. S15.** (a), (b) The computational models of bulk  $\text{MnO}_2$  and  $\text{K}_{0.296}\text{Mn}_{0.926}\text{O}_2$ , respectively.

**Table S1.** The comparative table of morphology, specific surface areas and average pore diameters of our prepared products with previously reported literature.

| Samples                                                           | Morphology    | Specific surface area (m <sup>2</sup> g <sup>-1</sup> ) | Average pore diameters (nm) | Device                                                     | Energy and power density                             | Reference |
|-------------------------------------------------------------------|---------------|---------------------------------------------------------|-----------------------------|------------------------------------------------------------|------------------------------------------------------|-----------|
| nanoporous carbon@K <sub>0.5</sub> Mn <sub>2</sub> O <sub>4</sub> | nanosheets    | /                                                       | /                           | NCMO//NC                                                   | 60 Wh kg <sup>-1</sup> at 1200 W kg <sup>-1</sup>    | [30]      |
| ultrathin MnO <sub>2</sub>                                        | nanosheets    | /                                                       | /                           | MnO <sub>2</sub> /carbon fiber//graphene/carbon fiber      | 27.2 Wh kg <sup>-1</sup> at 979.7 W kg <sup>-1</sup> | [31]      |
| MnO <sub>2</sub> -CNT nanocomposite                               | nanoparticles | /                                                       | /                           | MnO <sub>2</sub> -CNT//activated carbon                    | 25 Wh kg <sup>-1</sup> at 500 W kg <sup>-1</sup>     | [32]      |
| MnO <sub>2</sub> /graphene nanocomposites                         | nanoparticles | 332                                                     | /                           | MnO <sub>2</sub> /graphene//graphene                       | 35.2 Wh kg <sup>-1</sup> at 7.4 kW kg <sup>-1</sup>  | [33]      |
| graphene/MnO <sub>2</sub> composite                               | nanoparticles |                                                         |                             | graphene/MnO <sub>2</sub> //activated carbon nanofibers    | 51.1 Wh kg <sup>-1</sup> at 198 kW kg <sup>-1</sup>  | [34]      |
| graphene-MnO <sub>2</sub>                                         | nanorods      | 43.8                                                    | 2-5                         | graphene-MnO <sub>2</sub> //densely stacked graphene       | 62.4 Wh kg <sup>-1</sup> at 180 kW kg <sup>-1</sup>  | [35]      |
| K <sub>0.296</sub> Mn <sub>0.926</sub> O <sub>2</sub>             | nanoparticles | 52.4                                                    | 3.7                         | K <sub>0.296</sub> Mn <sub>0.926</sub> O <sub>2</sub> //AC | 70 Wh kg <sup>-1</sup> at 1200 kW kg <sup>-1</sup>   | This work |
